# Supplementary material
Source: publisher site journal article supplement (https://e-cmh.org/upload/media/cmh-2024-0060-Supplementary-Fig-2.pdf)
Supplement: Supplementary file 1 [file cmh-2024-0060-Supplementary-Fig-2.pdf]

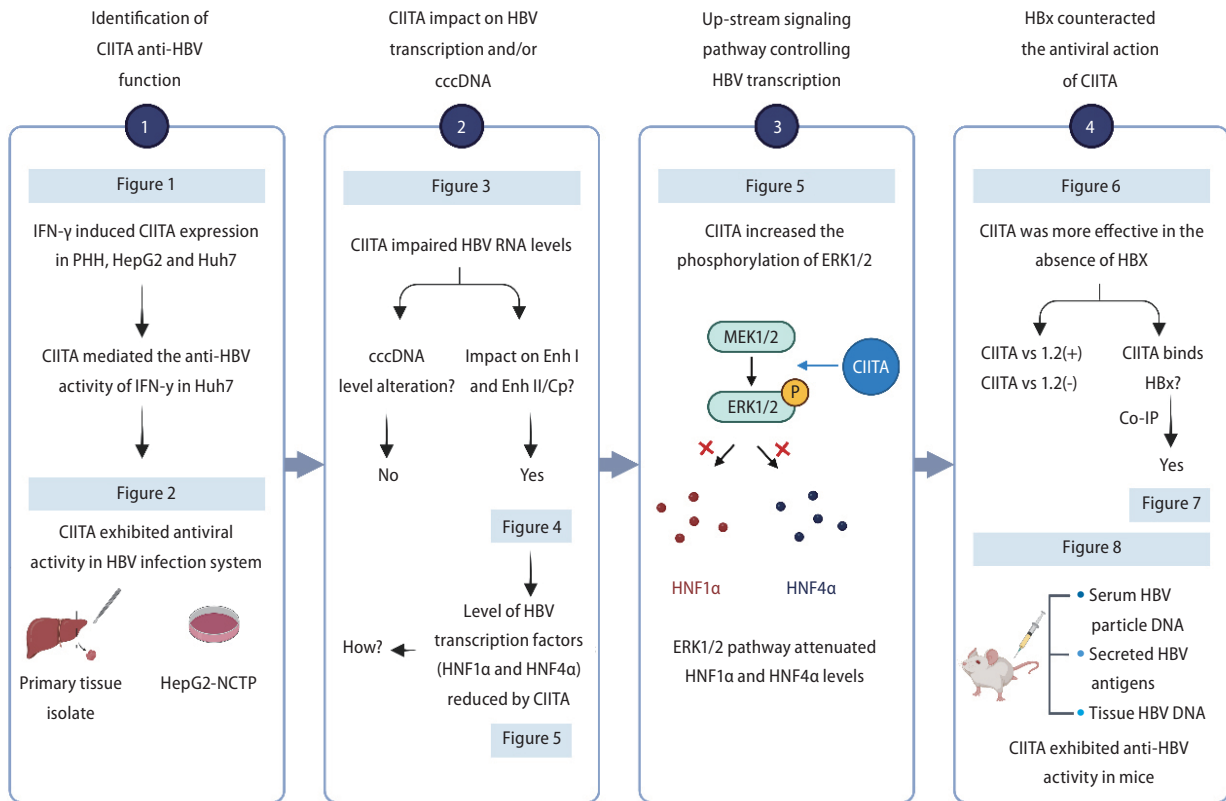

**Supplementary Figure 2.** Illustration of the step-by-step experimental flow of the mechanistic analysis performed in the current study. Created with BioRender.com.
